# Supplementary material for: Is Secretory Activation Delayed in Women with Type Two Diabetes? A Pilot Study
Source: Nutrients. 2022 Mar 22;14(7):1323. doi: 10.3390/nu14071323 (PMC9002373; doi:10.3390/nu14071323)
Supplement: Supplementary file 1 [file nutrients-14-01323-s001.zip › nutrients-1605231-supplementary.pdf]

## Supplementary Materials

### Contents

1. Table S1: Baseline Demographics of All Recruited Women  
Page 2
2. Table S2: HBA1c Women Type 2 Diabetes.  
Page 2
3. Table S3: Timing/Reasons for Supplementation with Formula in Hospital  
Page 3
4. Table S4: Factors Predicting Breastfeeding at Four Months Post-partum  
Page 4
5. Table S5: Time to Reach Citrate Concentration of 3.6 mM  
Page 5
6. Figure S1: Percentage of Each Group Reaching Citrate of 3.6mM vs Hours Postpartum  
Page 5
7. Table S6: Variables and Association with Reaching Citrate 3.6mM by 84 hours  
Page 6

**Table S1. Baseline Demographics of All Recruited Women.**

| Variable                             | T2DM         | BMI-matched Controls | Normal BMI Controls | Comparison, P-value                                                               |
|--------------------------------------|--------------|----------------------|---------------------|-----------------------------------------------------------------------------------|
| Number                               | 18           | 18                   | 18                  |                                                                                   |
| Pre-pregnancy BMI                    | 31.2 +/- 6.5 | 29.5 +/- 5.9         | 21.6 +/- 2.0        | a vs. b vs. c, <0.001***<br>a vs. b, 0.37<br>a vs. c, <0.001***<br>b vs. c, 0.005 |
| Pre-delivery BMI                     | 33.7 +/- 6.8 | 32.4 +/- 5.9         | 25.8 +/- 2.5        | a vs. b vs. c, 0.002**<br>a vs. b, 0.84<br>a vs. c, 0.002**<br>b vs. c, 0.02*     |
| Age at due date (years)              | 34.8 +/- 5.1 | 32.7 +/- 4.7         | 34.1 +/- 4.1        | a vs. b vs. c, 0.35                                                               |
| Education (Tertiary education)       | 66% (13/19)  | 56% (10/18)          | 73% (13/18)         | a vs. b, 0.51<br>a vs. c, >0.99                                                   |
| Breastfeeding Intentions Score (/16) | 14 +/- 2     | 14 +/- 3             | 15 +/- 1            | a vs. b vs. c, 0.54                                                               |

*Compared using one way ANOVA*

Legend: BMI=Body mass index (kilogram/meter<sup>2</sup>)

Groups: a=T2DM, b=BMI-matched, c=normal BMI

**Table S2: HBA1c (mmol/mol) Women Type 2 Diabetes**

|                   |     |     |     |     |     |     |     |     |     |     |     |     |     |
|-------------------|-----|-----|-----|-----|-----|-----|-----|-----|-----|-----|-----|-----|-----|
| 6.3               | 5.1 | 5.1 | 5.5 | 5.8 | 5.3 | 5.9 | 5.6 | 5.6 | 5.4 | 5.0 | 5.2 | 5.4 | 5.9 |
| Mean 5.5% +/- 0.4 |     |     |     |     |     |     |     |     |     |     |     |     |     |

**Table S3: Timing/Reasons for Initial Supplementation with Formula in Hospital**

| Group | Time         | Reason (chart)                                                                                         | Reason (woman)           | Feeding method (discharge) | Feeding method (4 months) |
|-------|--------------|--------------------------------------------------------------------------------------------------------|--------------------------|----------------------------|---------------------------|
| A     | 47           | Maternal request                                                                                       | Not available            | BF                         | BF                        |
| A     | Not recorded | To meet 'full quota' in setting - increased work of breathing, neonatal infection, SCN admission       | Poor supply              | BF                         | FF                        |
| A     | 4.5          | Hypoglycaemia BGL 2.6<br>To meet 'full quota' (30mls/kg/day)                                           | Poor supply              | MF                         | FF                        |
| A     | 2.0          | Hypoglycaemia BGL 2.6 mmol/l<br>To meet 60mls/kg/day q3h as 'minimal maternal supply'                  | Not available            | MF                         | MF                        |
| A     | 15           | Hypoglycaemia BGL 2.8 mmol/l                                                                           | Poor supply              | FF                         | MF                        |
| A     | 6.5          | Hypoglycaemia BGL 2.4mmol<br>To meet 'full quota' tops ups (60mls/kg/day)                              | Poor supply              | MF                         | MF                        |
| A     | 10.5         | No reason documented                                                                                   | Poor supply              | MF                         | FF                        |
| A     | 39.0         | To meet 'quota' once suck feeds started in SCN                                                         | Insufficient weight gain | MF                         | FF                        |
| A     | 91.0         | Jaundice. To meet 'half quota' + BF                                                                    | Jaundice                 | MF                         | MF                        |
| A     | 2.0          | Maternal request after glucose gel given for hypoglycaemia due to maternal concerns about supply       | Insufficient weight gain | MF                         | MF                        |
| B     | 11.5         | Maternal request                                                                                       | Poor supply              | MF                         | FF                        |
| B     | 32.0         | No reason documented                                                                                   | Poor supply              | BF                         | FF                        |
| B     | 10.5         | Poor feeding and lethargy with risk of sepsis. BF plus formula to meet 'full quota' (30mls/kg/day) q3h | Not available            | MF                         | Not Available             |
| C     | 41.0         | NG feeds due to tachypnoea/possible infection. Formula to meet 'quota' (90ml/kg/day)                   | Baby admitted to SCN     | BF                         | BF                        |
| C     | 49.5         | No reason documented                                                                                   | Poor supply              | BF                         | BF                        |
| C     | 7.0          | Maternal request                                                                                       | Poor supply              | MF                         | MF                        |

*Note: Formula prescribed according to estimated needs of a fully formula fed infant, hence 'full quota' equates to 30mls/kg/day on day one, 60mls/kg/day on day two and 90mls/kg day on day three of life.*

Legend: Time= time postpartum formula first given (hours to nearest half hour)

Reason (chart)= reason documented in neonatal chart at time first formula given to the infant

Reason (woman)= Reason woman gave at postpartum survey for first formula supplement

Feeding method (discharge)= Feeding method at hospital discharge

Feeding method (4 months)= Feeding method at four months postpartum

Groups: A=T2DM, B=BMI-matched, C=normal BMI. SCN=Special Care Nursery. BF = Breastfeeding only, FF = Formula Feeding only, MF = Mixed formula and Breastfeeding

**Table S4: Factors Predicting Breastfeeding at Four Months Postpartum**

| <b>Variable</b>                              | <b>Fully BF at 4 months</b> | <b>Not fully BF at 4 months</b> | <b>P- value</b> |
|----------------------------------------------|-----------------------------|---------------------------------|-----------------|
| <b>BMI &gt;25</b>                            |                             |                                 |                 |
| BMI >25                                      | 4/13 (31%)                  | 12/21(57%)                      | 0.17            |
| BMI < or equal 25                            | 9/13 (69%)                  | 9/21 (43%)                      |                 |
| <b>BMI &gt;30</b>                            |                             |                                 |                 |
| BMI >30                                      | 2/13 (15%)                  | 7/21 (33%)                      | 0.43            |
| BMI < or equal 30                            | 11/13 (85%)                 | 14/21 (67%)                     |                 |
| <b>Fully BF at discharge</b>                 | 13/13 (100%)                | 14/21 (67%)                     | 0.03 *          |
| <b>Not fully BF at discharge</b>             | 0/13 (0%)                   | 7/21 (33%)                      |                 |
| <b>Formula Supplementation in Hospital</b>   | 3/13 (21%)                  | 11/21 (52%)                     | 0.15            |
| <b>Citrate 3.6mM by 84 hours post-partum</b> | 9/13 (69%)                  | 13/18 (59%)                     | >0.99           |
|                                              | <b>Any BF at 4 months</b>   | <b>Not BF at 4 months</b>       |                 |
| <b>BMI &gt;25</b>                            |                             |                                 |                 |
| BMI >25( n=16)                               | 7/22 (32%)                  | 9/12 (75%)                      | 0.03 *          |
| BMI < or equal 25                            | 15/22 (68%)                 | 3/12 (25%)                      |                 |
| <b>BMI &gt;30</b>                            |                             |                                 |                 |
| BMI >30                                      | 3/9 (33%)                   | 6/9 (67%)                       | 0.04 *          |
| BMI< or equal 30                             | 19/25 (76%)                 | 6/25 (24%)                      |                 |
| <b>Formula Supplementation in Hospital</b>   | 7/22 (32%)                  | 7/12 (58%)                      | 0.16            |
| <b>Citrate 3.6 by 84 hours post-partum</b>   | 14/212 (64%)                | 8/10 (80%)                      | 0.68            |

*All groups combined, compared using Fisher's exact test, \* p-value <0.05.*

Legend: BMI: Body Mass Index, BF=breastfeeding

**Table S5: Time To Reach Citrate Concentration of 3.6 mM**

| Hours to Reach Citrate 3.6mM | Type 2 Diabetes (a) | BMI-matched (b) | Normal BMI (c) | Comparison, P- value                   |
|------------------------------|---------------------|-----------------|----------------|----------------------------------------|
| 12                           | 0/13 (0%)           | 0/10 (0%)       | 0/11 (0%)      | No difference                          |
| 24                           | 0/13 (0%)           | 0/10 (0%)       | 1/11 (9%)      | a vs. b, >0.99<br>a vs. c, 0.46        |
| 36                           | 0/13 (0%)           | 0/10 (0%)       | 1/11 (9%)      | a vs. b, >0.99<br>a vs. c, 0.46        |
| 48                           | 0/13 (0%)           | 0/10 (0%)       | 1/11 (9%)      | a vs. b, >0.99<br>a vs. c, 0.46        |
| 60                           | 2/13 (15%)          | 3/10 (30%)      | 2/11 (18%)     | a vs. b, 0.62<br>a vs. c, >0.99        |
| 72                           | 3/13 (23%)          | 6/10 (60%)      | 7/11 (64%)     | a vs. b, 0.04 *<br>a vs. c, 0.09       |
| 84                           | 4/12 (33%)          | 10/10 (100%)    | 10/11 (91%)    | a vs. b, 0.002 **<br>a vs. c, 0.009 ** |
| 96                           | 5/12 (42%)          | 10/10 (100%)    | 10/11 (91%)    | a vs. b, 0.005 **<br>a vs. c, 0.03 *   |
| 108                          | 6/12 (50%)          | 10/10 (100%)    | 10/11 (91%)    | a vs. b, 0.01 *<br>a vs. c, 0.07       |
| 120                          | 9/13 (69%)          | 10/10 (100%)    | 10/11 (91%)    | a vs. b, 0.10<br>a vs. c, 0.33         |
| 132                          | 9/13 (69%)          | 10/10 (100%)    | 10/11 (91%)    | a vs. b, 0.01 *<br>a vs. c, 0.33       |

Compared using Fisher's exact test, \*denotes  $p\text{-value} \leq 0.05$ , \*\*denotes  $p\text{-value} \leq 0.01$ .

Legend: mM=millimolar, BMI=Body mass index (kilogram/meter<sup>2</sup>)

Type 2 Diabetes=Group a(n=13), BMI-Matched=Group b(n=10), Normal-BMI=Group c (n=11)

Denominators vary as information about some variables not available for all women

**Figure S1**

**Percentage of Each Group Reaching Citrate of 3.6mM vs Hours Postpartum**

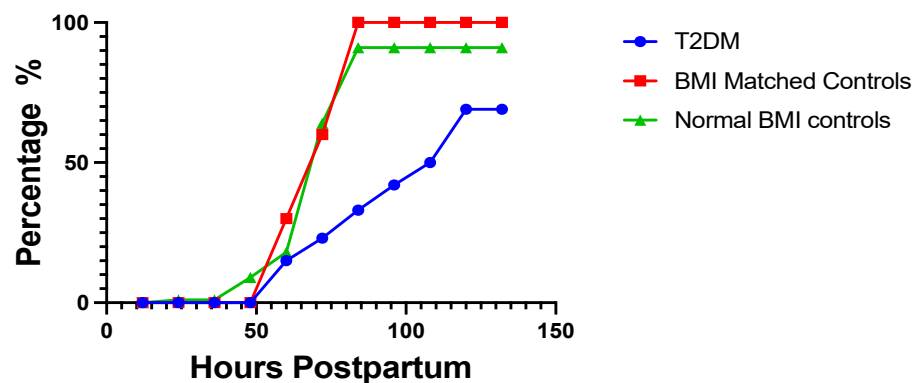

**Table S6: Variables and Association with Reaching Citrate 3.6mM by 84 hours**

|                                                | <b>Citrate 3.6mM<br/>reached by 84<br/>hours</b> | <b>Citrate 3.6mM not reached<br/>by 84 hours</b> | <i>P- value</i> |
|------------------------------------------------|--------------------------------------------------|--------------------------------------------------|-----------------|
| <b>Formula use in hospital</b>                 | 7/23 (30%)                                       | 6/10 (60%)                                       | 0.11            |
| <b>Fully BF at hospital<br/>discharge</b>      | 20/23 (87%)                                      | 6/9 (56%)                                        | 0.33            |
| <b>ICN/SCN admission</b>                       | 6/18 (33%)                                       | 3/9 (33%)                                        | 0.65            |
| <b>Perception SA after 72<br/>hours</b>        | 6/13 (46%)                                       | 2/8 (25%)                                        | >0.99           |
| <b>Regional anaesthesia</b>                    | 16/23 (70%)                                      | 8/10 (80%)                                       | >0.99           |
| <b>Blood loss of &gt;500mls<br/>peripartum</b> | 8/16 (50%)                                       | 2/10 (10%)                                       | 0.39            |
| <b>Infant hypoglycaemia</b>                    | 2/23 (9%)                                        | 8/11 (73%)                                       | <0.001 ***      |
| <b>Birth type vaginal</b>                      | 14/23 (73%)                                      | 6/10 (60%)                                       | >0.99           |
| <b>Birthweight &gt;3.5kg</b>                   | 8/22 (73%)                                       | 3/9 (27%)                                        | >0.99           |

*Compared using Fisher's exact test, \*\*\*denotes p-value≤0.001.*

Legend: BF=breastfeeding, ICN=Intensive Care Nursery, SCN=Special Care Nursery,  
SA=Secretory Activation, mM=millimolar.

Note: 8/9 hypoglycaemic infants were in T2DM group.

Denominators vary as information about some variables not available for all women.
